# Supplementary material for: Diverse mating phenotypes impact the spread of wtf meiotic drivers in Schizosaccharomyces pombe
Source: eLife. 2021 Dec 13;10:e70812. doi: 10.7554/eLife.70812 (PMC8789285; doi:10.7554/eLife.70812)
Supplement: Figure 1—figure supplement 2—source data 1. — Crosses shown in Figure 1—figure supplement 2 were genotyped before and after meiosis. The absolute and relative frequencies of each genotype were quantified. Segregation for each genetic marker is reported. From each cross, the list of recombinant genotypes are described. In Tables 1–3 on spreadsheet 1 (columns B–K) we show the genotypes, number of colonies counted, and initial frequencies of the two parents used in each cross represented in Figure 1—figure supplement 2B. In columns L, O, and R we show the expected frequency of Parent1, Parent2, and recombinants, respectively, predicted using Hardy-Weinberg. Columns M–Y show the results obtained after meiosis. In columns M–N, P–Q, and S–T we report the observed frequency and total number of colonies counted for Parent1, Parent2, and recombinants, respectively. In columns U–W (U–X for Table 3) we report the transmission frequency of each individual marker in the recombinants. The inbreeding coefficient for each cross is reported in column Y. In Tables 4–6 we show the numbers of each genotype obtained after meiosis for each replicate experiment. Parental genotypes are shown in white. Discordant genotypes are highlighted in blue at the bottom of each table. We also specify which experiments were performed manually and which were performed using robotics. Spreadsheet 2 shows similar data for the multiple density experiments shown in Figure 1—figure supplement 2C-D. Column Q also shows the G of fit G-test p-value. [file elife-70812-fig1-figsupp2-data1.xlsx]

## Sheet: Fig1.FigSup1B
Table #		Before meiosis									After meiosis
1	Cross	Full genotype parental 1	Frequency Parental 1	SEZYP1	Parental 1 Assayed	Full genotype parental 2	Frequency Parental 2	SEZYP2	Parental 2 Assayed	Total colonies genotyped G0	Predicted random mating frequency Parental 1	Observed Frequency Parental 1	Total genotyped as Parental 1	Predicted random mating frequency Parental 2	Observed Frequency Parental 2	Total genotyped as Parental 2	Predicted random mating frequency Recombinant	Observed Frequency Recombinant	Total genotyped as recombinant	Transmission lys- marker in recombinants	Transmissio ura- marker in recombinants	Transmission his- marker in recombinants	Total colonies genotyped G1	Inbreeding coefficient	Experiment
	SEZY2254xSEZY2254	lys4-	0.459	SEZY2254	123	ura4-,his3-	0.541	SEZY2245	144	266	0.27	0.43	122	0.35	0.44	127	0.37	0.13	38	0.45	0.37	0.53	287	0.648649	1
	SEZY2254xSEZY2254	lys4-	0.549	SEZY2254	95	ura4-,his3-	0.451	SEZY2245	78	173	0.36	0.41	156	0.27	0.4	152	0.37	0.2	76	0.46	0.47	0.54	384	0.459459	2
	SEZY2254xSEZY2254	lys4-	0.456	SEZY2254	172	ura4-,his3-	0.544	SEZY2245	205	377	0.27	0.43	156	0.36	0.39	146	0.37	0.18	66	0.41	0.41	0.53	366	0.513514	3
	SEZY2254xSEZY2254	lys4-	0.536679	SEZY44	139	ura4-,his3-	0.463321	SEZY3381	120	259	0.35	0.46	159	0.28	0.32	108	0.37	0.22	75	0.48	0.47	0.49	342	0.405405	4
	SEZY2254xSEZY2254	lys4-	0.560606	SEZY44	148	ura4-,his3-	0.439394	SEZY3381	116	264	0.38	0.35	118	0.25	0.47	161	0.37	0.18	63	0.44	0.49	0.4	342	0.513514	5
	SEZY2254xSEZY2254	lys4-	0.519802	SEZY44	105	ura4-,his3-	0.480198	SEZY3381	97	202	0.33	0.52	178	0.29	0.31	107	0.37	0.16	56	0.48	0.48	0.45	341	0.567568	6
	SEZY44_345xSEZY3381_3567	lys4-	0.424	SEZY44_SEZY44345	120	ura4-,his3-	0.576	SEZY3381_SEZY3567	163	283	0.24	0.25	54	0.39	0.42	90	0.37	0.32	68	0.53	0.46	0.49	212	0.135135	1
	SEZY44_345xSEZY3381_3567	lys4-	0.55	SEZY44_SEZY44345	88	ura4-,his3-	0.45	SEZY3381_SEZY3567	72	160	0.36	0.28	65	0.26	0.39	92	0.37	0.33	79	0.42	0.53	0.41	236	0.108108	2
	SEZY44_345xSEZY3381_3567	lys4-	0.417	SEZY44_SEZY44345	130	ura4-,his3-	0.583	SEZY3381_SEZY3567	182	312	0.23	0.28	73	0.4	0.33	87	0.36	0.39	103	0.36	0.58	0.36	263	-0.0833333	3
		Before meiosis									After meiosis
2	Cross	Full genotype parental 1	Frequency Parental 1	SEZYP1	Parental 1 Assayed	Full genotype parental 2	Frequency Parental 2	SEZYP2	Parental 2 Assayed	Total colonies genotyped G0	Predicted whole outrcrossing (h+ x h-) frequency Parental 1	Observed Frequency Parental 1	Total genotyped as Parental 1	Predicted whole outrcrossing (h+ x h-) frequency Parental 2	Observed Frequency Parental 2	Total genotyped as Parental 2	Predicted whole outrcrossing (h+ x h-) frequency recombinant	Observed Frequency Recombinant	Total genotyped as recombinant	Transmission lys- marker in recombinants	Transmissio ura- marker in recombinants	Transmission his- marker in recombinants	Total colonies genotyped G1	Inbreeding coefficient	Experiment
	SEZY44xSEZY3381	lys4-	0.433	SEZY44	103	ura4-,his3-	0.567	SEZY3381	135	238	0.06	0.14	46	0.2	0.14	46	0.74	0.73	245	0.51	0.47	0.49	337	0.980533	1
	SEZY44xSEZY3381	lys4-	0.448	SEZY44	65	ura4-,his3-	0.552	SEZY3381	79	143	0.13	0.14	32	0.13	0.14	33	0.75	0.72	169	0.51	0.52	0.46	234	0.9808	2
	SEZY44xSEZY3381	lys4-	0.468	SEZY44	22	ura4-,his3-	0.532	SEZY3381	198	372	0.13	0.12	22	0.13	0.15	29	0.75	0.73	139	0.5	0.55	0.42	190	0.980533	3
	SEZY345xSEZY3567	lys4-	0.52	SEZY345	179	ura4-,his3-	0.48	SEZY3567	165	344	0.15	0.1	38	0.11	0.11	42	0.75	0.79	303	0.44	0.53	0.41	383	0.978933	1
	SEZY345xSEZY3567	lys4-	0.476	SEZY345	78	ura4-,his3-	0.524	SEZY3567	86	164	0.13	0.14	22	0.13	0.08	12	0.75	0.78	123	0.56	0.46	0.56	157	0.9792	2
	SEZY345xSEZY3567	lys4-	0.503	SEZY345	158	ura4-,his3-	0.497	SEZY3567	156	314	0.13	0.13	46	0.13	0.13	45	0.75	0.74	264	0.5	0.5	0.49	355	0.980267	3
		Before meiosis									After meiosis
3	Cross	Full genotype parental 1	Frequency Parental 1	SEZYP1	Parental 1 Assayed	Full genotype parental 2	Frequency Parental 2	SEZYP2	Parental 2 Assayed	Total colonies genotyped G0	Predicted random mating frequency Parental 1	Observed Frequency Parental 1	Total genotyped as Parental 1	Predicted random mating frequency Parental 2	Observed Frequency Parental 2	Total genotyped as Parental 2	Predicted random mating frequency Recombinant	Observed Frequency Recombinant	Total genotyped as recombinant	Transmission ade- marker in recombinants	Transmission leu- marker in recombinants	Transmission ura- marker in recombinants	Transmission lys- marker in recombinants	Inbreeding coefficient	Total colonies genotyped G1	Experiment
	SEZY1178xSEZY2254	lys4-	0.6	SEZY2254	102	leu1, ura4, ade6-::HYG+	0.4	SEZY1178	68	170	0.39	0.36	123	0.19	0.42	144	0.45	0.22	75	0.49	0.64	0.45	0.46	0.511111	342	1
	SEZY1178xSEZY2254	lys4-	0.7	SEZY2254	91	leu1, ura4, ade6-::HYG+	0.3	SEZY1178	39	130	0.52	0.48	163	0.12	0.33	114	0.39	0.19	64	0.5	0.5	0.5	0.38	0.512821	341	2
	SEZY1178xSEZY2254	lys4-	0.570681	SEZY2254	109	leu1, ura4, ade6-::Hyg+	0.429319	SEZY1178	82	191	0.36	0.3	102	0.21	0.43	148	0.46	0.27	91	0.51	0.51	0.52	0.52	0.413043	341	3
	SEZY925xSEZY2254	lys4-	0.575949	SEZY2254	91	leu1, ura4, ade6-::G418+	0.424051	SEZY925	67	158	0.36	0.35	121	0.21	0.43	147	0.46	0.22	74	0.42	0.45	0.59	0.47	0.521739	342	1
	SEZY925xSEZY2254	lys4-	0.572192	SEZY2254	107	leu1, ura4, ade6-::G418+	0.427808	SEZY925	80	187	0.36	0.31	106	0.21	0.41	141	0.46	0.28	94	0.5	0.49	0.61	0.5	0.391304	341	2
	SEZY925xSEZY2254	lys4-	0.544444	SEZY2254	98	leu1, ura4, ade6-::G418+	0.455556	SEZY925	82	180	0.33	0.32	110	0.24	0.46	157	0.47	0.22	75	0.47	0.43	0.58	0.54	0.531915	342	3
						Recombinant phenotypes from robotics and scoring sheets
4	Manual collection
	Robotics collection		SEZY2254 X SEZY2245						SEZY(44/345) X SEZY(3381/2567)			SEZY44 X SEZY3381			SEZY345 X SEZY3567
		Genotype/Experiment	1	2	3	4	5	6	1	2	3	1	2	3	1	2	3
		his-,ura-,lys-	3	17	9	13	6	9	10	13	15	28	26	23	43	23	38
	SEZY2245 ura4-,his3-	his-,ura-,lys+	127	152	145	108	161	107	90	92	87	46	33	29	42	12	45
		his-,ura+,lys-	8	5	11	11	13	7	14	10	6	43	27	17	37	23	45
		his-,ura+,lys+	9	19	15	11	12	11	9	9	16	49	24	19	45	23	47
		his+,ura-,lys-	6	13	6	12	9	11	12	10	16	53	34	29	53	23	48
		his+,ura-,lys+	5	6	12	12	10	5	9	19	29	33	28	24	64	11	46
	Parental SEZY2254 lys4-	his+,ura+,lys-	122	156	157	159	118	178	54	65	73	46	33	22	38	22	46
		his+,ura+,lys+	7	16	12	16	13	13	14	18	21	39	30	27	61	20	40
	Discordant	Discordant % from recombinants	0	0	0	0	0	0	0	0	0	0	0	0	0	0	0
5			SEZY1178 x SEZY2254			Table 6			SEZY925 x SEZY2254
		Genotype/Experiment	1	2	3			Genotype/Experiment	1	2	3
		leu-,ura-,ade-,lys-,HYG+	9	5	8			leu-,ura-,ade-,lys-,G418+	3	5	11
	Parental SEZY1178 leu1-, ura4-, ade6-::HYG+	leu-,ura-,ade-,lys+,HYG+	144	114	148		Parental 925 leu1-, ura4-, ade6-::G418+	leu-,ura-,ade-,lys+,G418+	147
		leu-,ura-,ade+,lys-,HYG-	4	4	7			leu-,ura-,ade+,lys-,G418-	5	3	7
		leu-,ura-,ade+,lys+,HYG-	3	3	8			leu-,ura-,ade+,lys+,G418-	14	8	1
		leu-,ura+,ade-,lys-,HYG+	6	2	8			leu-,ura+,ade-,lys-,G418+	2	5	2
		leu-,ura+,ade-,lys+,HYG+	8	8	3			leu-,ura+,ade-,lys+,G418+	2	4	4
		leu-,ura+,ade+,lys-,HYG-	7	1	3			leu-,ura+,ade+,lys-,G418-	5	7	6
		leu-,ura+,ade+,lys+,HYG-	9	7	6			leu-,ura+,ade+,lys+,G418-	2	2	1
		leu+,ura-,ade-,lys-,HYG+	3	3	9			leu+,ura-,ade-,lys-,G418+	6	10	3
		leu+,ura-,ade-,lys+,HYG+	5	8	2			leu+,ura-,ade-,lys+,G418+	5	8	4
		leu+,ura-,ade+,lys-,HYG-	3	6	3			leu+,ura-,ade+,lys-,G418-	7	5	7
		leu+,ura-,ade+::HYG-,lys+	5	1	7			leu+,ura-,ade+,lys+,G418-	2	6	9
		leu+,ura+,ade-,lys-,HYG+	2	2	8			leu+,ura+,ade-,lys-,G418+	6	1	4
		leu+,ura+,ade-,lys+,HYG+	3	4	7			leu+,ura+,ade-,lys+,G418+	7	4	7
	Parental 2254 lys4-	leu+,ura+,ade+,lys-,HYG-	123	163	102		Parental 2254 lys4-	leu+,ura+,ade+,lys-,G418-	121
		leu+,ura+,ade+,lys+,HYG-	5	5	7			leu+,ura+,ade+,lys+,G418-	4	2	7
	Discordant	leu-,ura-,ade+,lys-,HYG+		1			Discordant	leu-,ura-,ade-,lys-,G418-	1
		leu-,ura-,ade+,lys+,HYG+	1	1	2			leu+,ura-,ade+,lys+,G418+	1		1
		leu+,ura+,ade+,lys-,HYG+	1		2			leu+,ura+,ade+,lys+,G418+	2	2
		leu+,ura+,ade+,lys+,HYG+	1	2	1			leu+,ura+,ade+,lys-,G418+		1	1
		Discordant %	4	6.34921	5.49451			Discordant %	5.40541	4.10959	2.66667

## Sheet: Fig1.FigSup1C-D 
		Genotyping before meiosis	Full genotype parental 1	Frequency Parental 1	SEZYP1	Parental 1 Assayed	Full genotype parental 2	Frequency Parental 2	SEZYP2	Parental 2 Assayed	Total colonies genotyped G0
	Sp	SEZY2254 X SEZY2245 0.1X	lys4-	0.596491	SEZY2254	68	ura4-, his3-	0.403509	SEZY2245	46	114
		SEZY(44_345) X SEZY(3381_3567) 0.1X	lys4-	0.521739	SEZY44 and SEZY44345	84	ura4-, his3-	0.478261	SEZY3381 and SEZY3567	77	161
		SEZY4351 X SEZY4353 0.1X	ura4-	0.513513	SEZY4351	76	ade6-::hphMX4+, lys1-::kanMX4+	0.486486	SEZY4353	72	148
	Sk	SEZY320 X SEZY707 0.1X	ura4-::natMX4	0.51579	SZY320	49	ade6-::hphMX4+, lys1-::kanMX4+	0.48421	SZY707	46	95
		SEZY871 X SEZY1516 0.1X	leu1-::hphMX4	0.429412	SEZY871	146	ade6-::G418	0.570588	SEZY1516	194	340
	Sp	Genotyping after meiosis	Predicted Frequency Parental 1	Observed Frequency Parental 1	Total genotyped as Parental 1	Predicted Frequency Parental 2	Observed Frequency Parental 2	Total genotyped as Parental 2	Predicted Frequency Recombinant	Observed Frequency Recombinant	Total genotyped as recombinant	Transmission marker lys- in recombinants	Transmission marker ade- in recombinants	Transmission marker ura- in recombinants	Total colonies genotyped G1	G of fit Gtest pvalue	Inbreeding Coefficient
		SEZY4351 X SEZY4353 0.1X	0.33	0.58	187	0.3	0.35	111	0.37	0.07	22	0.45	0.68	0.59	320	8e-07	0.816533
		SEZY4351 X SEZY4353 1X	0.33	0.47	149	0.3	0.37	119	0.37	0.16	52	0.4	0.56	0.46	320	1	0.56635
		SEZY4351 X SEZY4353 10X	0.33	0.36	116	0.3	0.45	143	0.37	0.19	61	0.57	0.48	0.56	320	0.207063	0.491295
		Genotyping after meiosis	Predicted Frequency Parental 1	Observed Frequency Parental 1	Total genotyped as Parental 1	Predicted Frequency Parental 2	Observed Frequency Parental 2	Total genotyped as Parental 2	Predicted Frequency Recombinant	Observed Frequency Recombinant	Total genotyped as recombinant	Transmission marker lys- in recombinants	Transmission marker ura- in recombinants	Transmission marker his- in recombinants	Total colonies genotyped G1	G of fit Gtest pvalue	Inbreeding Coefficient
		SEZY2254 X SEZY2245 0.1X	0.42	0.68	98	0.22	0.3	43	0.36	0.02	3	0	0.33	0.33	144	2e-07	0.942295
		SEZY2254 X SEZY2245 1X	0.42	0.45	65	0.22	0.4	57	0.36	0.15	22	0.68	0.64	0.5	144	1	0.576833
		SEZY2254 X SEZY2245 10X	0.42	0.57	82	0.22	0.28	41	0.36	0.15	21	0.33	0.43	0.33	144	0.907512	0.596068
		SEZY(44_345) X SEZY(3381_3567) 0.1X	0.33	0.35	51	0.29	0.26	37	0.37	0.39	56	0.54	0.43	0.54	144	0.796613	0.0390011
		SEZY(44_345) X SEZY(3381_3567) 1X	0.33	0.4	57	0.29	0.23	33	0.37	0.38	54	0.52	0.37	0.59	144	1	0.00189394
		SEZY(44_345) X SEZY(3381_3567) 10X	0.33	0.3	43	0.29	0.31	44	0.37	0.4	57	0.42	0.46	0.4	144	0.346766	0.113215
	Sk	Genotyping after meiosis	Predicted Frequency Parental 1	Observed Frequency Parental 1	Total genotyped as Parental 1	Predicted Frequency Parental 2	Observed Frequency Parental 2	Total genotyped as Parental 2	Predicted Frequency Recombinant	Observed Frequency Recombinant	Total genotyped as recombinant	Transmission marker lys- in recombinants	Transmission marker ade- in recombinants	Transmission marker ura- in recombinants	Total colonies genotyped G1	G of fit Gtest pvalue	Inbreeding Coefficient
		SEZY320 X SEZY707 0.1X	0.36	0.34	112	0.27	0.39	128	0.37	0.26	85	0.48	0.53	0.51	325	0.29385	0.296752
		SEZY320 X SEZY707 1X	0.36	0.34	109	0.27	0.38	122	0.37	0.29	94	0.41	0.51	0.37	325	1	0.222291
		SEZY320 X SEZY707 10X	0.36	0.3	96	0.27	0.33	108	0.37	0.37	121	0.45	0.53	0.55	325	0.001551	0.017219
		Genotyping after meiosis	Predicted Frequency Parental 1	Observed Frequency Parental 1	Total genotyped as Parental 1	Predicted Frequency Parental 2	Observed Frequency Parental 2	Total genotyped as Parental 2	Predicted Frequency Recombinant	Observed Frequency Recombinant	Total genotyped as recombinant	Transmission marker leu- in recombinants	Transmission marker ade- in recombinants	Total colonies genotyped G1	G of fit Gtest pvalue	Inbreeding Coefficient
		SEZY871 X SEZY1516 0.1X	0.43	0.54	182	0.32	0.29	98	0.25	0.18	60	0.48	0.47	340	1	0.286209
		SEZY871 X SEZY1516 1X	0.43	0.5	171	0.32	0.32	109	0.25	0.18	60	0.52	0.45	340	1	0.286209
		SEZY871 X SEZY1516 10X	0.43	0.42	144	0.32	0.35	120	0.25	0.22	76	0.54	0.45	340	0.0324925	0.0958642
	Manual collection		SEZY2254 X SEZY2245			SEZY(44/345) X SEZY(3381/2567)
	Robotics collection	Density/genotype	0.1X	1X	10X	0.1X	1X	10X
		his-,ura-,lys-	0	5	2	7	8	4
	Parental SEZY2245, ura4-, his3-	his-,ura-,lys+	43	76	64	93	54	109
		his-,ura+,lys-	0	5	2	13	12	12
		his-,ura+,lys+	1	1	3	10	12	7
		his+,ura-,lys-	0	5	3	10	8	8
		his+,ura-,lys+	1	4	4	7	4	14
	Parental SEZY2254, lys4-	his+,ura+,lys-	98	79	105	128	98	115
		his+,ura+,lys+	1	2	7	9	10	12
	Discordant	Discordant % from recombinants	0	0	0	0	0	0
			SEZY4351 X SEZY4353
		Density/Genotype	0.1X	1X	10X
		ade-,lys-,ura-,hphMX4+,kanMX4+	7	8	12
	Parental SEZY4353 ade6-::hphMX4+, lys1-::kanMX4+	ade-,lys-,ura+,hphMX4+,kanMX4+	111	119	143
		ade-,lys+,ura-,hphMX4+,kanMX4-	4	7	8
		ade-,lys+,ura+,hphMX4+,kanMX4-	2	13	7
		ade+,lys-,ura-,hphMX4-,kanMX4+	2	8	13
		ade+,lys-,ura+,hphMX4-,kanMX4+	1	5	9
	Parental SEZY4351 ura4-	ade+,lys+,ura-,hphMX4-,kanMX4-	187	149	116
		ade+,lys+,ura+,hphMX4-,kanMX4-	2	10	8
	Discordant	ade-,lys-,ura-,hphMX4+,kanMX4-			1
		ade-,lys+,ura-,hphMX4+,kanMX4+,		1
		ade-,lys+,ura+,hphMX4+,kanMX4+	2		1
		ade+,lys+,ura+,hphMX4+,kanMX4+	1		2
		ade+,lys+,ura+,hphMX4-,kanMX4+	1
		Discordant % from recombinants	18.1818	1.92308	6.55738
			SEZY320 X SEZY707
		Density/Genotype	0.1X	1X	10X
		ade-,lys-,ura-,hphMX4+,kanMX4+,natMX4+	11	17	15
	Parental 707, ade60, lys1-	ade-,lys-,ura+,hphMX4+,kanMX4+,natMX4-	128	122	108
		ade-,lys+,ura-,hphMX4+,kanMX4-,natMX4+	15	11	25
		ade-,lys+,ura+,hphMX4+,kanMX4-,natMX4-	19	18	22
		ade+,lys-,ura-,hphMX4-,kanMX4+,natMX4+	15	6	24
		ade+,lys-,ura+,hphMX4-,kanMX4+,natMX4-	15	16	16
	Parental 320, ura4-	ade+,lys+,ura-,hphMX4-,kanMX4-,natMX4+	112	109	96
		ade+,lys+,ura+,hphMX4-,kanMX4-,natMX4-	7	22	14
	Discordant	ade-,lys+,ura-,hphMX4-,kanMX4-,natMX4+			1
		ade-,lys+,ura+,hphMX4+,kanMX4+,natMX4-			1
		ade-,lys+,ura+,hphMX4+,kanMX4+,natMX4+		2
		ade+,lys+,ura-,hphMX4-,kanMX4+,natMX4+	2
		ade+,lys+,ura-,hphMX4+,kanMX4+,natMX4+		1	1
		ade+,lys+,ura+,hphMX4+,kanMX4+,natMX4+	1
		ade+,lys+,ura+,hphMX4+,kanMX4-,natMX4+		1
		ade+,lys+,ura+,hphMX4+,kanMX4-,natMX4-			1
		ade+,lys+,ura+,hphMX4+,kanMX4+,natMX4-			1
		Discordant % from recombinants	3.52941	4.25532	4.13223
			SEZY871 X SEZY1516 10X
		Density/Genotype	0.1X	1X	10X
		leu-,ade-,hphMX4+,kanMX4+	29	29	41
	Parental 871, leu1-::hphMX4+	leu-,ade+,hphMX4+,kanMX4-	182	171	144
	Parental 1516, ade6-::kanMX4+	leu+,ade-,hphMX4-,kanMX4+	98	109	120
		leu+,ade+,hphMX4-,kanMX4-	27	26	34
	Discordant	leu+,ade-,hphMX4+,kanMX4+		1
		leu+,ade+,hphMX4+,kanMX4-	1	1
		leu+,ade+,hphMX4+,kanMX4+	3	1	1
		Discordant % from recombinants	0.666667	0.517241	0.131579
