# Supplementary material for: Diverse mating phenotypes impact the spread of wtf meiotic drivers in Schizosaccharomyces pombe
Source: eLife. 2021 Dec 13;10:e70812. doi: 10.7554/eLife.70812 (PMC8789285; doi:10.7554/eLife.70812)
Supplement: Figure 1—source data 1. — List of S. pombe natural isolates reported by Tusso et al., 2019. Those selected to measure inbreeding coefficients using microscopy are highlighted and observations for these from other studies are reported (Jeffares et al., 2015; Nieuwenhuis et al., 2018). [file elife-70812-fig1-data1.xlsx]

## Sheet: Sheet2
Information taken from Tusso et al., (2015) Supp fig 1, Sp proportion data taken from Supp fig S3
Strains used in this study
NBRP ID	JB#	Proportion Sp	Other strains IDs	Location collected	Continent collected	Substrate	Jeffares et al., (2015)	Nieuwenhuis 2018 observation	Nieuwenhuis 2018 classification
FY28959	JB758	0.0379221	NOTT30;NCYC936;CBS10394	Sri Lanka	Asia	fermenting toddy
FY28989	JB864	0.0509091	NOTT28*;ATCC24751; CBS10391;NCYC132	Africa	Africa	African Millet Beer
FY29052	JB953	0.0576623	PHAFF65-116	Australia	Australia	exudate of a Eucalyptus? Tree
FY28965	JB837	0.0779221	NOTT1;UWOPS92.229.4	Mexico	Americas	Tequilla
FY28994	JB871	0.0883117	NOTT35;CBS2628;NCYC3436	Pakistan	Asia	palm wine, made from Borassus flabellifer
FY29033	JB916	0.0914286	NOTT80;CBS352;DBVPG6373	Indonesia	Asia	arrack factory (distilled alcoholic drink made from sap of the coconut flower)	Switcher	Mating	h-N (4P3K)
FY25282	JB1197	0.0997403	NBRC0340;NOTT159; AJ14275;IFO0340;JCM1846	ND	ND	ND
FY29091	JB1206	0.12	NBRC10569;NOTT168	ND	ND	ND
FY29090	JB1205	0.142338	NBRC10568;NOTT167	ND	ND	ND
FY28996	JB874	0.218701	NOTT38;CBS5682; DBVPG6376;NCYC3421	South Africa	Africa	millet beer
FY28981	JB853	0.23013	NOTT17;UFMGA1000;CBS10465	Brazil (Belo Horizonte)	Americas	must of Brazilian cachaça	switcher	Mating	h90
FY29044	JB939	0.23013	CLIB842	Spain	Europe	winemaking	Switcher	Mating	h90
FY28976	JB848	0.245195	NOTT12;UFMGR428; CBS10475	Brazil (Aracaju)	Americas	frozen pulp of Eugenia uniflora ("pitanga", Myrtaceae)
FY29092	JB1207	0.24987	NBRC10570;NOTT169	ND	ND	ND
#N/A	JB872	0.275325	NOTT36;CBS2775;IFO0347; NBRC0347;NCYC3418	Japan	Asia	fermenting molasses
FY28968	JB840	0.281558	NOTT4;UFMGR435;CBS10458	Brazil (Aracaju)	Americas	frozen pulp of Eugenia uniflora ("pitanga", Myrtaceae)
FY28970	JB842	0.286753	NOTT6;UFMGA602;CBS10460	Brazil (Belo Horizonte)	Americas	must of Brazilian cachaça
FY28986	JB858	0.291429	NOTT22;UFMGA738;CBS10464	Brazil (Belo Horizonte)	Americas	must of Brazilian cachaça
FY28980	JB852	0.291948	NOTT16;UFMGA529;CBS10462	Brazil (Belo Horizonte)	Americas	must of Brazilian cachaça
FY29031	JB914	0.292468	NOTT78;CBS357;DBVPG6280;CLIB834	Jamaica	Americas	molasses
FY28966	JB838	0.295584	NOTT2;UWOPS94.422.2	Mexico	Americas	Tequilla
FY28969	JB841	0.297662	NOTT5;UFMGA1263;CBS10469	Brazil (Vicosa)	Americas	must of Brazilian cachaça
FY28974	JB846	0.300779	NOTT10;UFMGA826;CBS10465	Brazil (Belo Horizonte)	Americas	must of Brazilian cachaça	Switcher	Mating	h90
FY29068	JB1180	0.303377	Kambucha_YFS276;NOTT132	ND	ND	ND	NA	Mating	h90
FY28982	JB854	0.305455	NOTT18;UFMGR427;CBS10474	Brazil (Aracaju)	Americas	frozen pulp of Eugenia uniflora ("pitanga", Myrtaceae)
FY29030	JB913	0.306494	NOTT77;CBS1058	Indonesia	Asia	molasses
FY29027	JB910	0.329351	NOTT74;DBVPG6449;CBS1062; IFO0344;NRRLY-1358	ND	ND	cane sugar molasses
FY28963	JB762	0.33039	NOTT75;CBS358;DBVPG6374	ND	ND	ND
FY28988	JB862	0.341299	NOTT26;NCYC380;CBS10392	ND	ND	raw cane sugar
FY29020	JB900	0.349091	NOTT64;Y831	South Africa	Africa	industrial glucose
FY28973	JB845	0.354286	NOTT9;UFMGR434;CBS10476	Brazil (Aracaju)	Americas	frozen pulp of Eugenia uniflora ("pitanga", Myrtaceae)
FY29022	JB902	0.371948	NOTT66;CBS374	Netherlands (Delft)	Europe	molasses	NA	Mating	h90
FY29006	JB884	0.376104	NOTT48;DBVPG2810	Malta	Europe	wine
FY25303	JB917	0.398442	NOTT81;CBS1057;DBVPG6375	Sweden	Europe	brewer's yeast
FY25308	JB1117	0.402078	YHL281;Zimmer1987_0208	Holland	Europe	malt
FY29048	JB943	0.417662	CLIB846	France	Europe	winemaking
FY29019	JB899	0.440519	NOTT63;Y470?	ND	ND	ND
FY29060	JB1171	0.442597	CECT12622;NOTT123;IFI356	ND	ND	grape juice
FY29040	JB934	0.447792	CLIB837	France	Europe	winemaking
FY29035	JB929	0.455584	NOTT93;CBS1063; DBVPG6450;NRRLY-1362	ND	ND	cane sugar molasses
FY29054	JB1154	0.46026	AWRI1875	Australia (Barossa Valley)	Australia	ND
FY28995	JB873	0.46026	NOTT37;CBS5680; DBVPG6448;NCYC3422	Poland	Europe	apple
FY25289	JB1110	0.469091	YHL266;Zimmer1987_0209	ND	ND	red current jelly
FY29034	JB918	0.496104	NOTT82;CBS1059	Mauritius	Other	cane sugar
FY28955	JB4	0.499221	CBS5557;CCY44-6-1;CBS10393; DBVPG6275;JCM8262;NBRC1608;NCYC683	Spain	Europe	Listan grapes
FY28997	JB875	0.526234	NOTT39;CBS7335	Spain	Europe	alpechín (water which oozes from a heap of olives)
FY29000	JB878	0.567273	NOTT42;DBVPG2804	Malta	Europe	wine
FY29036	JB930	0.575584	NOTT94;FRR2208	Australia (Nundah)	Australia	glace syrup
FY29047	JB942	0.641558	CLIB845	France	Europe	winemaking
FY29037	JB931	0.768831	NOTT95;FRR2535	ND	ND	raspberry cordial concentrate
FY29062	JB1174	0.861818	CECT12918;NOTT126;IFI2139	ND	ND	grape juice
FY28992	JB869	0.958442	NOTT33;Y0036;CBS10498	South Africa	Africa	wine
#N/A	JB22	0.961558	Leupolds 972 derived h-; CBS10395;NCYC1430	France	Europe	rotten grapes
FY29043	JB938	0.962078	CLIB841	France	Europe	winemaking	Switcher	Mating	h90
FY28961	JB760	0.962597	NOTT50;DBVPG2812	Italy (Sicily)	Europe	grape must treated with SO2
FY28993	JB870	0.962597	NOTT34;Y0037;CBS10499	South Africa	Africa	wine
FY29001	JB879	0.962597	NOTT43;DBVPG2805	Malta	Europe	wine
