# Supplementary material for: Diverse mating phenotypes impact the spread of wtf meiotic drivers in Schizosaccharomyces pombe
Source: eLife journal article supplement (doi:10.7554/elife.70812), 2021-12-13

1 2 3 4 5 6 7 8 9 10 11 12 13 14 15 16 17 18 19 20

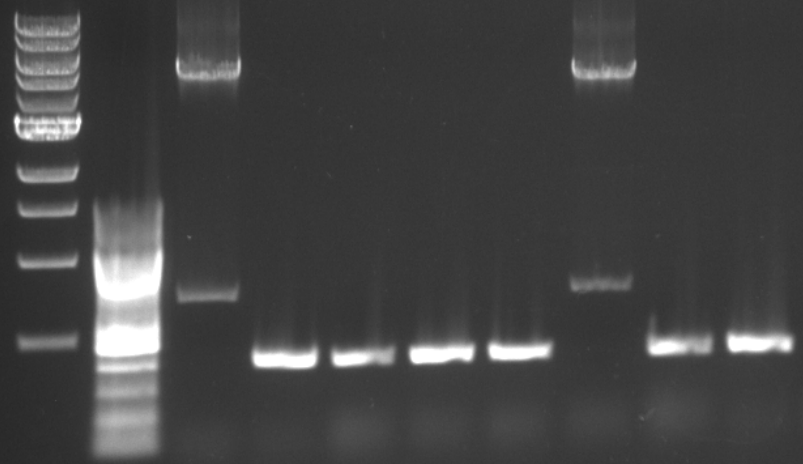

Supplement: supp [file elife-70812-supp-v1.zip]
