# Supplementary material for: Diverse mating phenotypes impact the spread of wtf meiotic drivers in Schizosaccharomyces pombe
Source: eLife. 2021 Dec 13;10:e70812. doi: 10.7554/eLife.70812 (PMC8789285; doi:10.7554/eLife.70812)
Supplement: Supplementary file 2. [file elife-70812-supp2.xlsx]

## Sheet: Plasmids
plasmids used
plasmid	resistance	marker	notes	reference
pSZB331	Ampicillin	kanMX4	derivative of pFA6 that integrates at ura4, yielding ura-	Bravo Núñez, 2020
pSZB332	Ampicillin	kanMX4	derivative of pFA6 that integrates at ura4, yielding ura-	Bravo Núñez, 2020
pSZB437	Ampicillin	kanMX4	pSZB331 with GFP cloned into the SpeI site	this study
pSZB716	Ampicillin	kanMX4	pSZB332 with Sk wtf4 cloned into the SacI site.	this study
pSZB882	Ampicillin	kanMX4	pSZB332 with mCherry cloned into the SpeI site	this study
pSZB904	Ampicillin	kanMX4	pSZB716 with GFP cloned into the SpeI site.	this study
pSZB909	Ampicillin	kanMX4	pSZB716 with mCherry cloned into the SpeI site.	this study
pSZB1215	Ampicillin	leu1	YFP under control of mfm3 promoter (h- cell-specific).	Jakociunas et al., 2013
pSZB1216	Ampicillin	ura4	CFP under control of map2 promoter (h+ cell specific).	Jakociunas et al., 2013
